# Supplementary material for: Filamentous recombinant human Tau activates primary astrocytes via an integrin receptor complex
Source: PubMed Central journal article supplement (PMC7782792; doi:10.1038/s41467-020-20322-w), 2021-01-04
Supplement: 41467_2020_20322_MOESM1_ESM.pdf [file 41467_2020_20322_MOESM1_ESM.pdf]

## Supplementary information

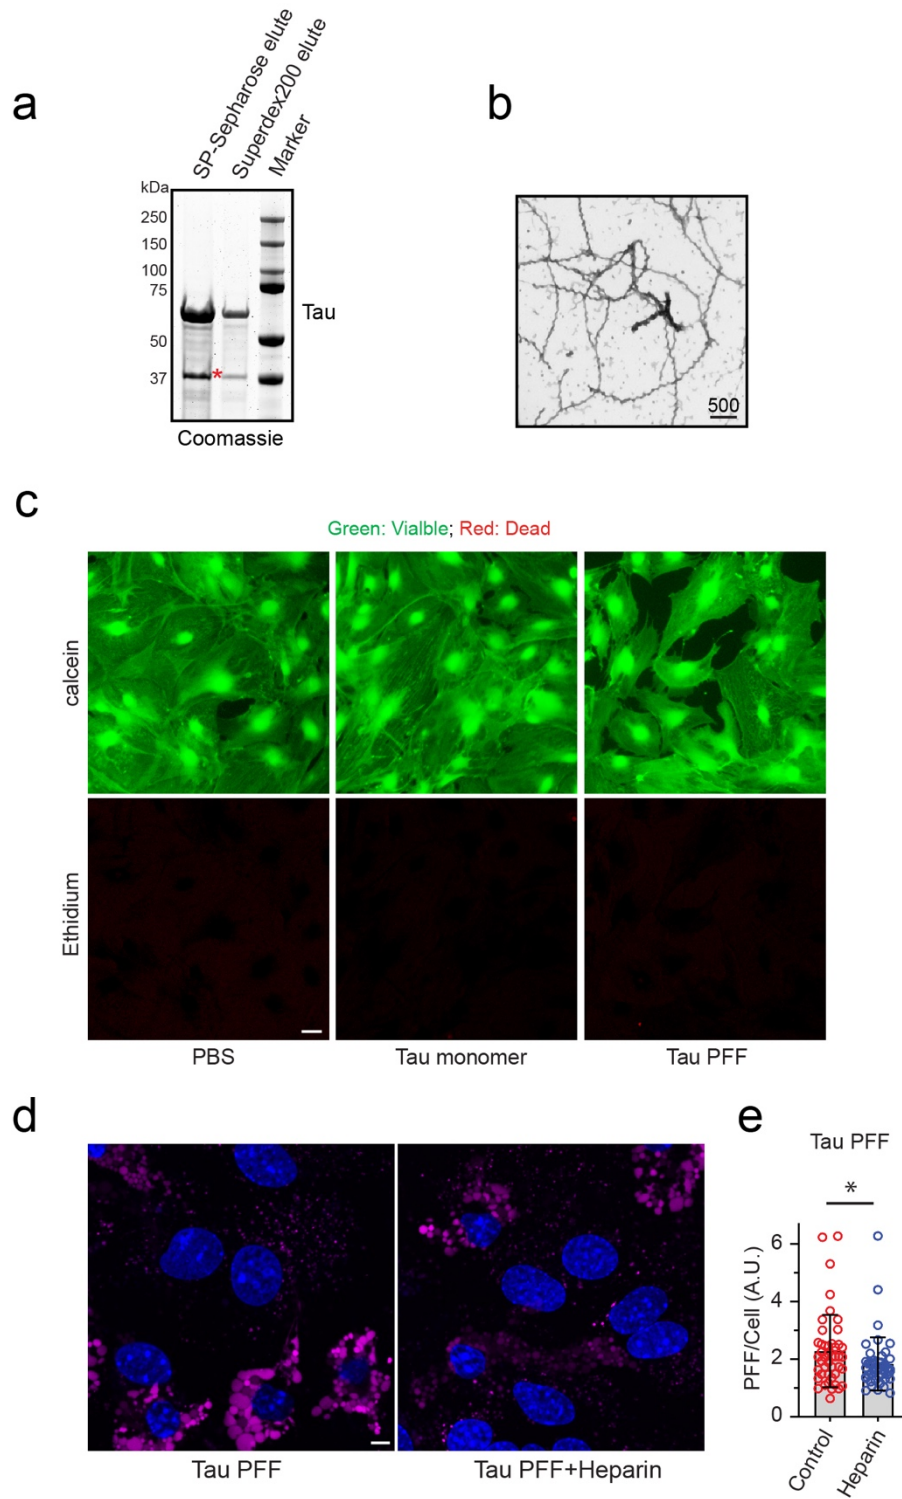

**Figure S1. Tau PFF endocytosis by primary astrocytes is independent of HSPG.**

**(a)** SDS-PAGE and Coomassie blue staining show the purified untagged Tau 2N4R protein. Protein eluates from SP-Sepharose and Superdex 200 were analyzed. Asterisk indicates a degradation product.

**(b)** A representative negative stain EM picture of the assembled Tau PFF before sonication. Scale bar, 500nm.

**(c)** Short-term treatment of astrocytes with Tau monomer or PFFs did not induce cell death. Primary astrocytes treated with PBS, Tau monomer or PFF (200 nM) for 6 h were stained with a green-fluorescent dye calcein-AM to label viable cells and a red-fluorescent dye ethidium homodimer-1 to label dead cells. Scale bar, 10  $\mu$ m.

**(d)** Astrocytic uptake of Tau PFF is not significantly inhibited by heparin. Astrocytes were incubated with Alexa 594-conjugated Tau PFF (Magenta) for 2 h in the absence or presence of 50  $\mu$ g/ml heparin. Cells were stained with Hoechst (Blue) before confocal imaging.

**(e)** Quantification of Tau PFF fluorescence signal in individual cells in experiments shown in **d**. Mean  $\pm$ SEM, n=3 biologically independent experiments. \*, p<0.05 by two-tailed unpaired student t-test.

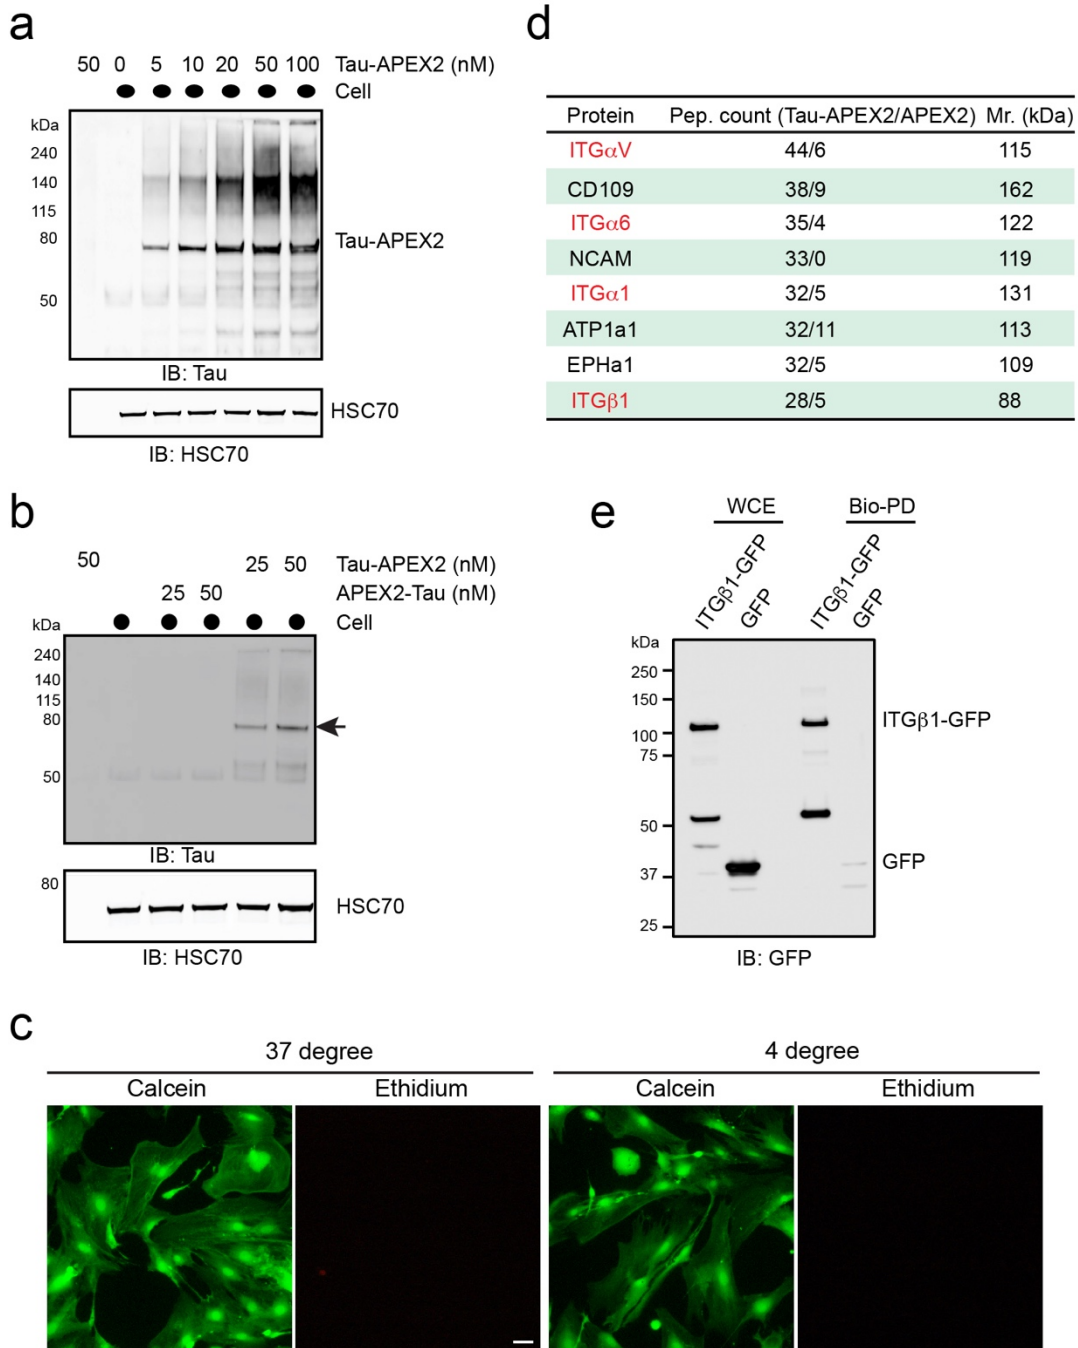

**Figure S2. Identification of integrin  $\alpha$ V/ $\beta$ 1 as a Tau interactor in primary astrocytes.**

(a) Tau-APEX2 binds to the cell surface in a dose dependent manner. Sh-SY5Y cells were incubated with the indicated amount of Tau-APEX2 on ice for 3 h. After washing, cells were lysed and cell lysates were analyzed by immunoblotting. As a negative control, 50 nM Tau PFF was incubated with buffer (no cells).

(b) Tau-APEX2 but not APEX2-Tau binds to the cell surface. Sh-SY5Y cells were incubated with the indicated amount of Tau protein on ice for 2 h, washed, and then lysed. Cell lysates were analyzed by immunoblotting. The arrow indicates Tau-APEX2.

(c) Short-term treatment of astrocytes with low temperature did not induce cell death. Primary astrocytes treated at 37 °C or 4 °C for 1 h were stained with calcein-AM and ethidium homodimer-1. Scale bar, 10 μm.

(d) A summary of the top candidates identified by mass spectrometry.

(e) Validation of Tau-APEX2-mediated biotinylation of ITGβ1. Tau-APEX2 was incubated with HEK293T cells transfected with either an empty vector (EV) or an ITGβ1-GFP-expressing plasmid followed by *in vitro* biotinylation. Whole cell extracts (WCE) were either directly analyzed by immunoblotting or first subjected to biotin pulldown (PD) before immunoblotting with GFP antibodies.

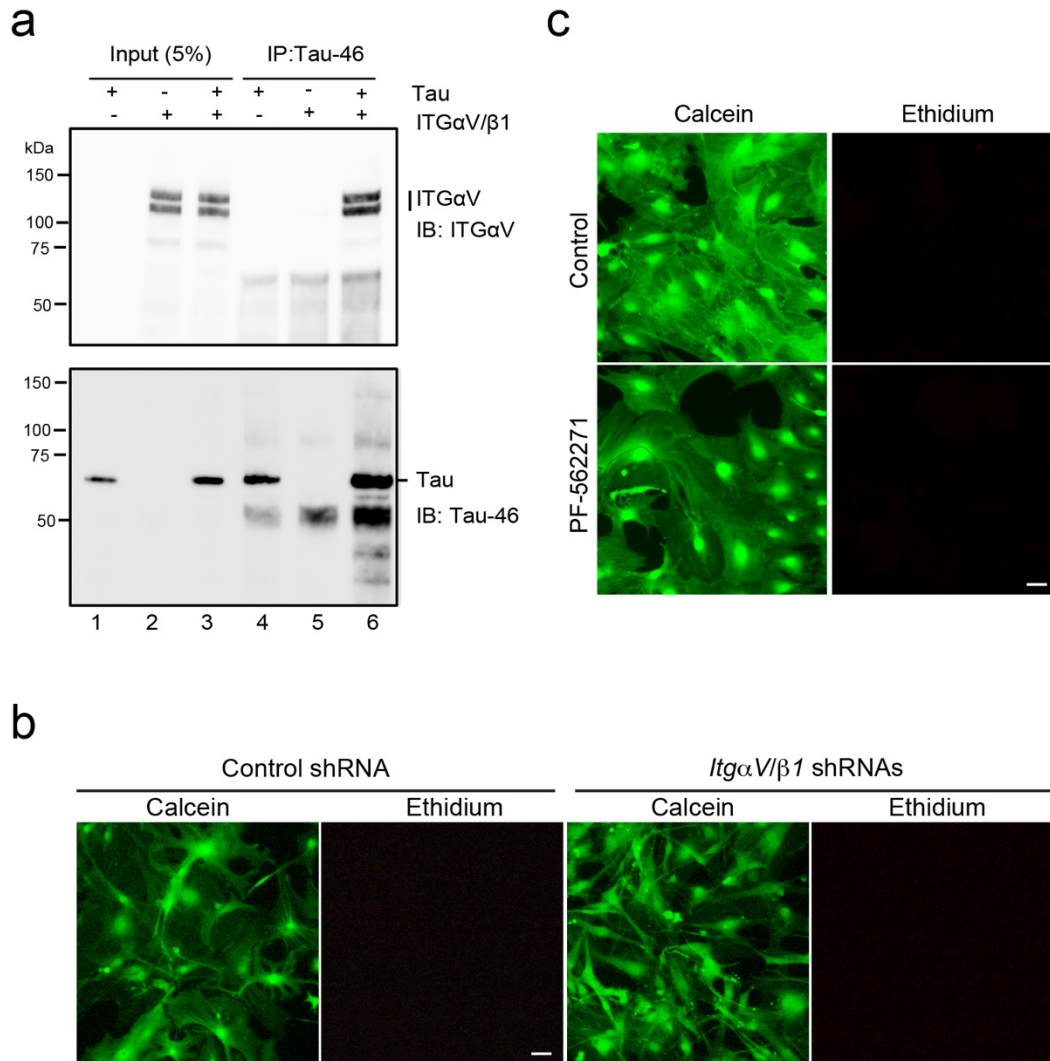

**Figure S3. Tau binds integrin  $\alpha$ V/ $\beta$ 1 directly in vitro.**

(a) Recombinant integrin  $\alpha$ V/ $\beta$ 1 (100 nM) was incubated with PBS as a control or 100 nM monomeric recombinant Tau protein as indicated. A fraction of the binding reaction (5% input) was analyzed directly by immunoblotting (lanes 1-3). The remaining samples were subjected to immunoprecipitation with Tau-46 antibodies before immunoblotting (lanes 4-6).

(b) The effect of integrin  $\alpha V/\beta 1$  knockdown on astrocyte viability. Cells infected with lentiviruses expressing either control or integrin  $\alpha V/\beta 1$  shRNAs for 72 h were stained with calcein-AM and ethidium homodimer-1. Scale bar, 10  $\mu\text{m}$ .

(c) The effect of FAK inhibition on astrocyte viability. Cells treated with the indicated drugs for 8 h were stained with calcein-AM and ethidium homodimer-1. Scale bar, 10  $\mu\text{m}$ .

a

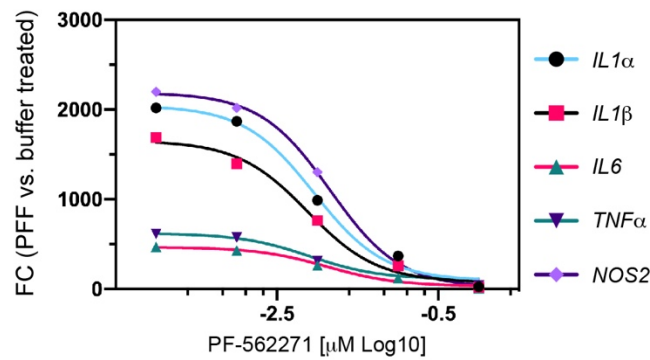

b

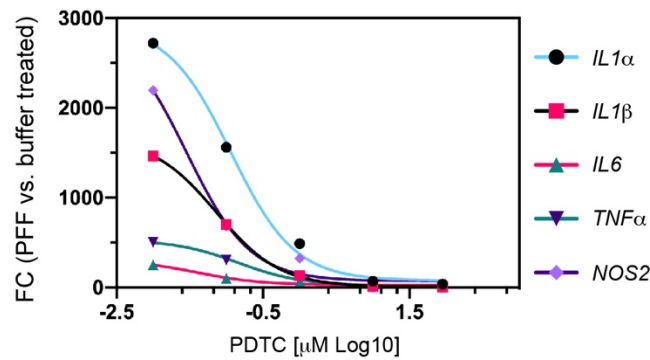

**Figure S4. Dose dependent suppression of Tau-PFF-induced inflammation by PF-562271 and PDTC.**

Immunopurified astrocytes were pre-treated with the indicated concentration of PF-562271 (a) or PDTC (b) for 1h and then treated with either PBS or Tau PFF. The expression of the indicated genes was determined by qRT-PCR and normalized to PBS-treated samples.

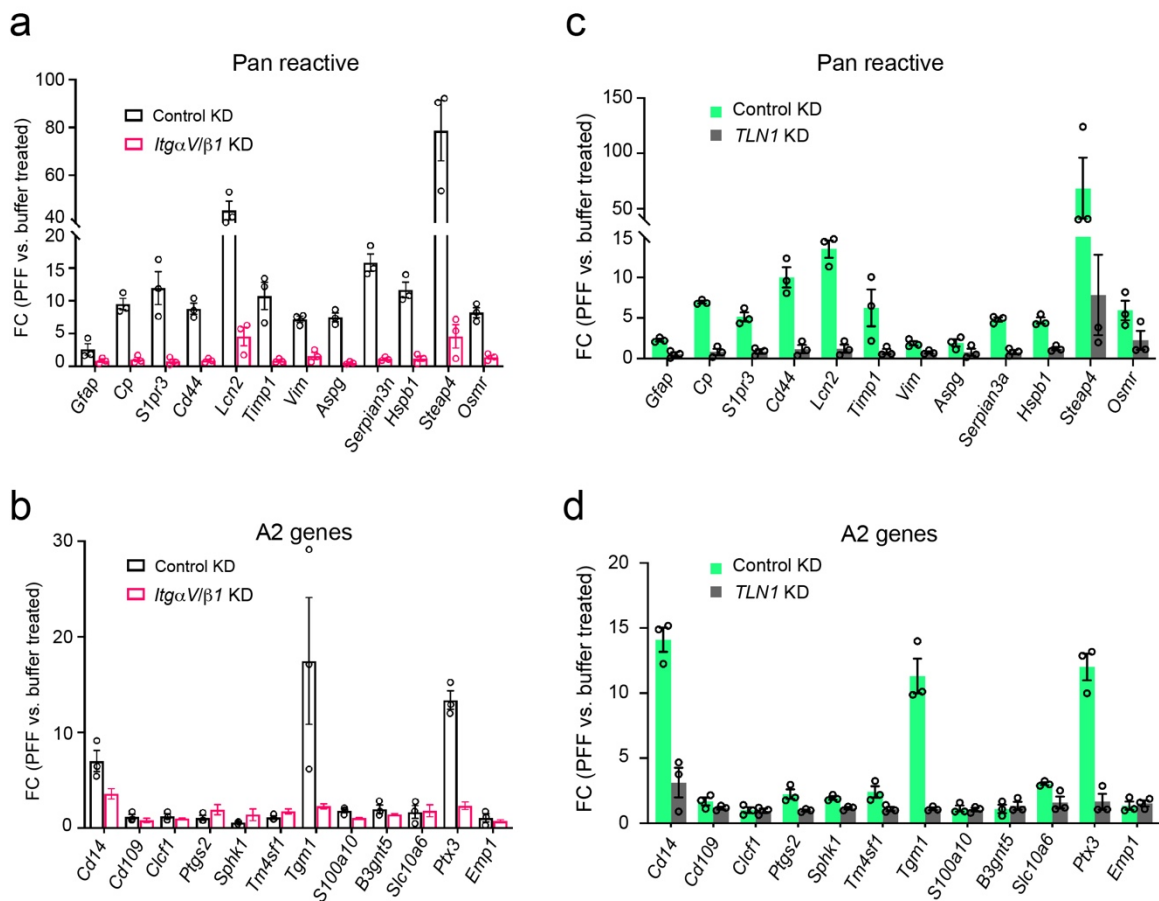

**Figure S5. The effect of integrin  $\alpha V/\beta 1$  and Talin1 knockdown on the expression of pan-reactive and A2 specific genes in astrocytes.**

(a, b) Control or integrin  $\alpha V/\beta 1$  knockdown astrocytes were treated with either PBS or Tau PFFs. The expression of the indicated genes was determined by qRT-PCR and normalized to PBS-treated samples. Mean  $\pm$ SEM, n=3 independent experiments.

(c, d) Control or Talin1(TLN) knockdown immunopurified astrocytes were treated with either PBS or Tau PFFs. The expression of the indicated genes was determined by qRT-PCR and normalized to PBS-treated samples. Mean  $\pm$ SEM, n=3 independent experiments.

a

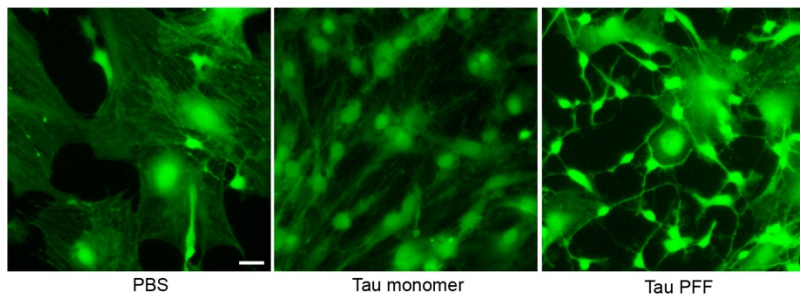

b

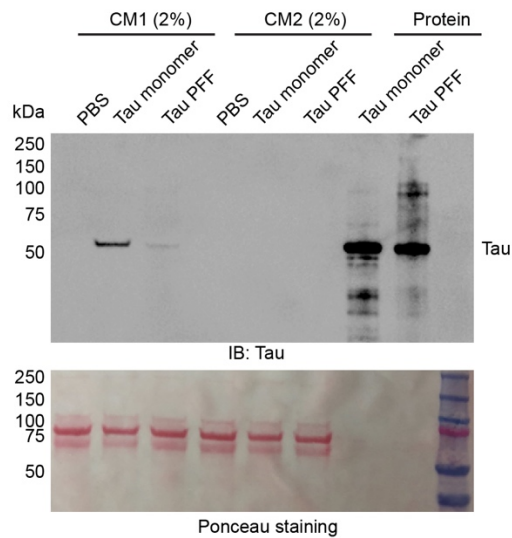



**Figure S6 Tau PFF-treated astrocytes release a neurotoxic factor(s).**

**(a)** Morphological changes in Tau PFF-treated astrocytes. Primary astrocytes were treated with PBS, Tau monomer or PFF (200nM, 6 h) and then replated in a new dish with fresh medium for 48 h before calcein-AM staining. Scale bar, 10  $\mu$ m.

**(b)** No Tau carryover was detected in conditioned medium (CM) from Tau-treated astrocytes. Astrocytes were treated with PBS, monomeric Tau (200nM) or Tau PFF (200nM) for 6h. Conditioned medium (CM1) was harvested. Cells were then washed, trypsinized, and transferred to a new plate. After cell attachment, conditioned medium (CM2) was harvested. The CM1 and CM2 were analyzed by immunoblotting together with purified Tau monomer and PFF as a control.

**SI Table 1 A list of reagents**

| <b>REAGENTS</b>                                | <b>SOURCE</b>                                               |
|------------------------------------------------|-------------------------------------------------------------|
| <b>PLASMIDS</b>                                |                                                             |
| pcDNA3 APEX2-NES                               | A gift from Alice Ting Addgene (# 49386) <sup>1</sup>       |
| TAU/PET29B                                     | A GIFT FROM PETER KLEIN ADDGENE (# 16316) <sup>2</sup>      |
| pEF1- $\alpha$ V                               | A gift from Timothy Springer Addgene (# 27290) <sup>3</sup> |
| Integrin- $\beta$ 1-GFP                        | A gift from Martin Humphries Addgene (# 69804) <sup>4</sup> |
| pCMV-VSV-G                                     | A gift from Bob Weinberg Addgene (#8454) <sup>5</sup>       |
| pSPAX2                                         | A gift from Didier Trono Addgene (#12260)                   |
| pEGFP-C1                                       | Clontech                                                    |
| ITG $\alpha$ V MISSION SHRNA SHRNA PLASMID DNA | Sigma<br>SHCLND-NM_008402 TRCN0000066589                    |
| ITG $\beta$ 1 MISSION SHRNA SHRNA PLASMID DNA  | Sigma<br>SHCLND-NM_010578 TRCN0000348624                    |
| TLN1 MISSION SHRNA SHRNA PLASMID DNA           | Sigma<br>SHCLND-NM_011602 TRCN0000108756                    |
| <b>CHEMICALS</b>                               |                                                             |
| PUROMYCIN                                      | Sigma                                                       |
| PDTC                                           | R&D                                                         |
| PH RODO-RED SUCCINIMIDYL ESTER                 | ThermoFisher Scientific                                     |
| ALEXA 596 SUCCINIMIDYL ESTER                   | ThermoFisher Scientific                                     |
| DYNASORE                                       | TOCRIS                                                      |
| JASPLAKINOLIDE                                 | TOCRIS                                                      |
| HOECHEST 33342                                 | ThermoFisher Scientific                                     |
| IPTG                                           | TOCRIS                                                      |
| PF-562271                                      | Selleckchem                                                 |
| BIOTIN-PHENOL                                  | Iris-Biotech Cat # LS-3500.0250                             |
| <b>ANTIBODIES (Dilution)</b>                   |                                                             |
| INTEGRIN $\alpha$ V (1:1,000)                  | Abcam Cat # ab179475                                        |
| INTEGRIN $\beta$ 1 (1:1,000)                   | Abcam Cat # ab52971                                         |
| NF $\kappa$ B P65 (1:500)                      | Rockland Cat# 200-301-065                                   |
| INTEGRIN $\beta$ 5 (20 $\mu$ g/immune-panning) | R&D System Cat# AF3824                                      |

|                                                                         |                                         |
|-------------------------------------------------------------------------|-----------------------------------------|
| GFAP (1:250)                                                            | Proteintech Cat # 60190                 |
| TAU (TAU 46) (1:1,000)                                                  | Santa Cruz Cat # sc-32274               |
| TAU (TAU H150) (2 µg/IP)                                                | Santa Cruz Cat # sc-5587                |
| BIOTIN (BTN,4) (1:1,000)                                                | Thermo Fisher Cat # MA5-11251           |
| FLAG (M2) (1:1,000)                                                     | Sigma Cat # F1804-200UG                 |
| GFP (B2) (1:500)                                                        | Santa Cruz Cat# SC-9996                 |
| HSP90 (1:1,000)                                                         | Santa Cruz Cat # sc-69703               |
| CD45 (1.25 µg/immune-panning)                                           | BD Biosciences Cat# 550539              |
| ANTI-MOUSE IgG PEROXIDASE ANTIBODY (1:5,000)                            | Sigma Cat# A4416-1ML                    |
| ANTI-RABBIT IgG PEROXIDASE ANTIBODY (1:5,000)                           | Sigma Cat# A6154-1ML                    |
| GOAT ANTI-MOUSE IgG (H+L) ALEXA FLUOR <sub>680</sub> (1:10,000)         | Thermo Fisher Cat# A21058               |
| GOAT ANTI-RABBIT IgG (H&L) DYLIGHT <sub>800</sub> CONJUGATED (1:10,000) | Rockland Cat# 611-145-122               |
| GOAT ANTI-MOUSE IgG ALEXA FLUOR <sub>488</sub> (1:1,000)                | Thermo Fisher Cat# A21121               |
| GOAT ANTI-RAT IgG (H + L) (80 µg/ immune-panning)                       | Jackson ImmunoResearch Cat# 112-005-167 |
| DONKEY ANTI-SHEEP IGG (H + L) (80 µg/ immune-panning)                   | Jackson ImmunoResearch Cat# 713-005-147 |
| <b>REGENTS</b>                                                          |                                         |
| STREPTAVIDIN MAGNETIC BEADS                                             | Pierce Cat # 88817                      |
| SODIUM ASCORBATE                                                        | VWR International Cat # 95035-692       |
| TROLOX                                                                  | Sigma-Aldrich Cat. # 238813-5G          |
| SODIUM AZIDE                                                            | VWR International Cat # AA14314-22      |
| HYDROGEN PEROXIDE 30% (WT/WT)                                           | Sigma-Aldrich Cat # H1009-100ML         |
| <b>PROTEIN</b>                                                          |                                         |
| RECOMBINANT HUMAN INTEGRIN ALPHA 1 BETA 1 PROTEIN                       | R&D system                              |

**SI Table 2. qPCR primers used in the study**

|                 |                             |
|-----------------|-----------------------------|
| IL1 $\alpha$ -F | 5'-GGGAAGATTCTGAAGAAGAG     |
| IL1 $\alpha$ -R | 5'-GAGTAACAGGATATTTAGAGTCG  |
| IL1 $\beta$ -F  | 5'-TGTGAAATGCCACCTTTTGA     |
| IL1 $\beta$ -R  | 5'-GTGCTCATGTCCTCATCCTG     |
| IL6-F           | 5'-GACAACCACGGCCTTCCCTACTTC |
| IL6-R           | 5'-TCATTTCCACGATTTCCCAGAGA  |
| TNF $\alpha$ -F | 5'-CCGATGGGTTGTACCTTGTC     |
| TNF $\alpha$ -R | 5'-CGGACTCCGCAAAGTCTAAG     |
| IL10-F          | 5'-AAGGCAGTGGAGCAGGTGAA     |
| IL10-R          | 5'-CCAGCAGACTCAATACACAC     |
| NOS2-F          | 5'-CACCTTGGAGTTCACCCAG      |
| NOS2-R          | 5'-ACCACTCGTACTTGGGATGC     |
| TGF $\beta$ 1-F | 5'-TACCATGCCAACTTCTGTCTGGGA |
| TGF $\beta$ 1-R | 5'-TGTGTTGGTTGTAGAGGGCAAGGA |
| CCL2-F          | 5'-TCAGCCAGATGCAGTTAACG     |
| CCL2-R          | 5'-GATCCTCTTGTAGCTCTCCAGC   |
| CCL3-F          | 5'-GACTGCCTGCTGCTTCT        |
| CCL3-R          | 5'-GATCTGCCGGTTTCTCTTAG     |
| CCL4-F          | 5'-CATGAAGCTCTGCGTGTCT      |
| CCL4-R          | 5'-CTGCCGGGAGGTGTAA         |
| CXCL10-F        | 5'-GCCGTCATTTTCTGCCTCAT     |
| CXCL10-R        | 5'-GCTTCCCTATGGCCCTCATT     |
| CCL12-F         | 5'-AGAATCACAAGCAGCCAGTGT    |

|         |                                |
|---------|--------------------------------|
| CCL12-R | 5'-ATCCAAGTGGTTTATGGAATTCTTAAC |
| ITGβ1-F | 5'-ATGCCAAATCTTGCGGAGAAT       |
| ITGβ1-R | 5'-TTTGCTGCGATTGGTGACATT       |
| ITGαV-F | 5'-CCTGAGACTGAAGAAGAC          |
| ITGαV-R | 5'-CCTTGCTGAATGAACTTG          |
| ITGβ5-F | 5'-TGACGAAGAACCACTATA          |
| ITGβ5-R | 5'-CTACTGTACGCATTGATAA         |
| ITGα6-F | 5'-AAGGAAGGATGTGGAGAC          |
| ITGα6-R | 5'-TTGAATTGGAAGGTAAGAGAAT      |
| ITGα1-F | 5'-AGCCTATCCTGAGACCTT          |
| ITGα1-R | 5'-TCTTATCTTCACCACAGTTCT       |
| ITGα3-F | 5'-GAGCTGTGGTTGGTGCTTG         |
| ITGα3-R | 5'-GCACTTCCACAAGAGGAGGAT       |
| TLN1-F  | 5'-CTGGCCTCACAAGCCAAG          |
| TLN1-R  | 5'-TTGATGTGAGCGCCTATCTCT       |
| ligp1-F | 5'-GGGGCAATAGCTCATTGGTA        |
| ligp1-R | 5'-ACCTCGAAGACATCCCCTTT        |
| Gbp2-F  | 5'-GGGGTCACTGTCTGACCACT        |
| Gbp2-R  | 5'-GGGAAACCTGGGATGAGATT        |
| Fbln5-F | 5'-CTTCAGATGCAAGCAACAA         |
| Fbln5-R | 5'-AGGCAGTGTCAGAGGCCTTA        |
| Ugt1a-F | 5'-CCTATGGGTCACCTTGCCACT       |
| Ugt1a-R | 5'-AAAACCATGTTGGGCATGAT        |
| Psmb8-F | 5'-CAGTCCTGAAGAGGCCTACG        |
| Psmb8-R | 5'-CACTTTCACCCAACCGTCTT        |

|                  |                          |
|------------------|--------------------------|
| Srgn-F           | 5'-GCAAGGTTATCCTGCTCGGA  |
| Srgn-R           | 5'-TGGGAGGGCCGATGTTATTG  |
| Amigo2-F         | 5'-GAGGCGACCATAATGTCGTT  |
| Amigo2-R         | 5'-GCATCCAACAGTCCGATTCT  |
| Clcf1-F          | 5'-CTTCAATCCTCCTCGACTGG  |
| Clcf1-R          | 5'-TACGTCCGAGTTCAGCTGTG  |
| Tgm1-F           | 5'-CTGTTGGTCCCGTCCCAA    |
| Tgm1-R           | 5'-GGACCTTCCATTGTGCCTGG  |
| S100A10-F        | 5'-CCTCTGGCTGTGGACAAAAT  |
| S100A10-R        | 5'-CTGCTCACAAGAAGCAGTGG  |
| Sphk1-F          | 5'-GATGCATGAGGTGGTGAATG  |
| Sphk1-R          | 5'-TGCTCGTACCCAGCATAGTG  |
| Slc10a6-F        | 5'-GCTTCGGTGGTATGATGCTT  |
| Slc10a6-R        | 5'-CCACAGGCTTTTCTGGTGAT  |
| Tm4sf1-F         | 5'-GCCCAAGCATATTGTGGAGT  |
| Tm4sf1-R         | 5'-AGGGTAGGATGTGGCACAAG  |
| B3gnt5-F         | 5'-CGTGGGGCAATGAGAACTAT  |
| B3gnt5-R         | 5'-CCCAGCTGAACTGAAGAAGG  |
| VCAM-F           | 5'-TCTGGGAAGCTGGAACGAAG  |
| VCAM-R           | 5'-CAAACACTTGACCGTGACCG  |
| ITGaM-F          | 5'-ATGGACGCTGATGGCAATACC |
| ITGaM-R          | 5'-TCCCCATTACGTCTCCCA    |
| Serp1-F          | 5'-ACAGCCCCCTCTGAATTCTT  |
| Serp1-R          | 5'-GGATGCTCTCCAAGTTGCTC  |
| NF- $\kappa$ B-F | 5'-CCAACGCCCTCTTCGACTAC  |

|             |                            |
|-------------|----------------------------|
| NF-κB-R     | 5'-GATCCCTCACGAGCTGAGC     |
| GFAP-F      | 5'-AGAAAGGTTGAATCGCTGGA    |
| GFAP-R      | 5'-CGGCGATAGTCGTTAGCTTC    |
| CD109-F     | 5'-CACAGTCGGGAGCCCTAAAG    |
| CD109-R     | 5'-GCAGCGATTTTCGATGTCCAC   |
| CD14-F      | 5'-GGACTGATCTCAGCCCTCTG    |
| CD14-R      | 5'-GCTTCAGCCCAGTGAAAGAC    |
| H2-D1-F     | 5'-TCCGAGATTGTAAAGCGTGAAGA |
| H2-D1-R     | 5'-ACAGGGCAGTGCAGGGATAG    |
| H2-T23-F    | 5'-GGACCGCGAATGACATAGC     |
| H2-T23-R    | 5'-GCACCTCAGGGTGA CTTCAT   |
| Emp1-F      | 5'-GAGACACTGGCCAGAAAAGC    |
| Emp1-R      | 5'-TAAAAGGCAAGGGAATGCAC    |
| Fkbp5-F     | 5'-TATGCTTATGGCTCGGCTGG    |
| Fkbp5-R     | 5'-CAGCCTTCCAGGTGGACTTT    |
| CD44-F      | 5'-TCAGGATAGCCCCACAACAAC   |
| CD44-R      | 5'-GACTCCGTACCAGGCATCTTC   |
| Serpina3n-F | 5'-GTCTTTCAGGTGGTCCACAAGG  |
| Serpina3n-R | 5'-GCCAATCACAGCATAGAAGCG   |
| CP-F        | 5'-GATGTTTCCCCAAACGCCTG    |
| CP-R        | 5'-GTAGCTCTGAGACGATGCTTGA  |
| S1pr3-F     | 5'-CTTGCAGAACGAGAGCCTGT    |
| S1pr3-R     | 5'-CCTCAACAGTCCACGAGAGG    |
| GFAP-F      | 5'-AACCGCATCACCATTCTGT     |
| GFAP-R      | 5'-TCCTTAATGACCTCGCCATCC   |

|          |                           |
|----------|---------------------------|
| Lcn2-F   | 5'-CCGACACTGACTACGACCAG   |
| Lcn2-R   | 5'-AATGCATTGGTCGGTGGGAA   |
| Timp1-F  | 5'-CGCTAGAGCAGATACCACGA   |
| Timp1-R  | 5'-CCAGGTCCGAGTTGCAGAAA   |
| Vim-F    | 5'-GAGGAGATGAGGGAGTTGCG   |
| Vim-R    | 5'-CTGCAATTTTTCTCGCAGCC   |
| ASPG-F   | 5'-CAGGTGCCCAGGTTCTATC    |
| ASPG-R   | 5'-GTCCACCTTGGTTGTCCGAT   |
| Hsbp1-F  | 5'-GAGATCACTGGCAAGCACGA   |
| Hsbp1-R  | 5'-ATTGTGTGACTGCTTTGGGC   |
| Steap4-F | 5'-CAAACGCCGAGTACCTTGCT   |
| Steap4-R | 5'-CAGACAAACACCTGCCGACT   |
| Osmr-F   | 5'-GTCATTCTGGACATGAAGAGGT |
| Osmr-R   | 5'-AATCACAGCGTTGGGTCTGA   |

## References

1. Lam, S.S. *et al.* Directed evolution of APEX2 for electron microscopy and proximity labeling. *Nat Methods* **12**, 51-54 (2015).
2. Hedgepeth, C.M. *et al.* Activation of the Wnt signaling pathway: a molecular mechanism for lithium action. *Dev Biol* **185**, 82-91 (1997).
3. Takagi, J., Petre, B.M., Walz, T. & Springer, T.A. Global conformational rearrangements in integrin extracellular domains in outside-in and inside-out signaling. *Cell* **110**, 599-511 (2002).
4. Parsons, M., Messent, A.J., Humphries, J.D., Deakin, N.O. & Humphries, M.J. Quantification of integrin receptor agonism by fluorescence lifetime imaging. *J Cell Sci* **121**, 265-271 (2008).
5. Stewart, S.A. *et al.* Lentivirus-delivered stable gene silencing by RNAi in primary cells. *RNA* **9**, 493-501 (2003).
